# Supplementary material for: A2AR Expression and Immunosuppressive Environment Independent of KRAS and GNAS Mutations in Pseudomyxoma Peritonei
Source: MDPI journal article supplement (doi:10.3390/biomedicines11072049), 2023-07-20
Supplement: s1 [file s1]

# Supplementary Materials

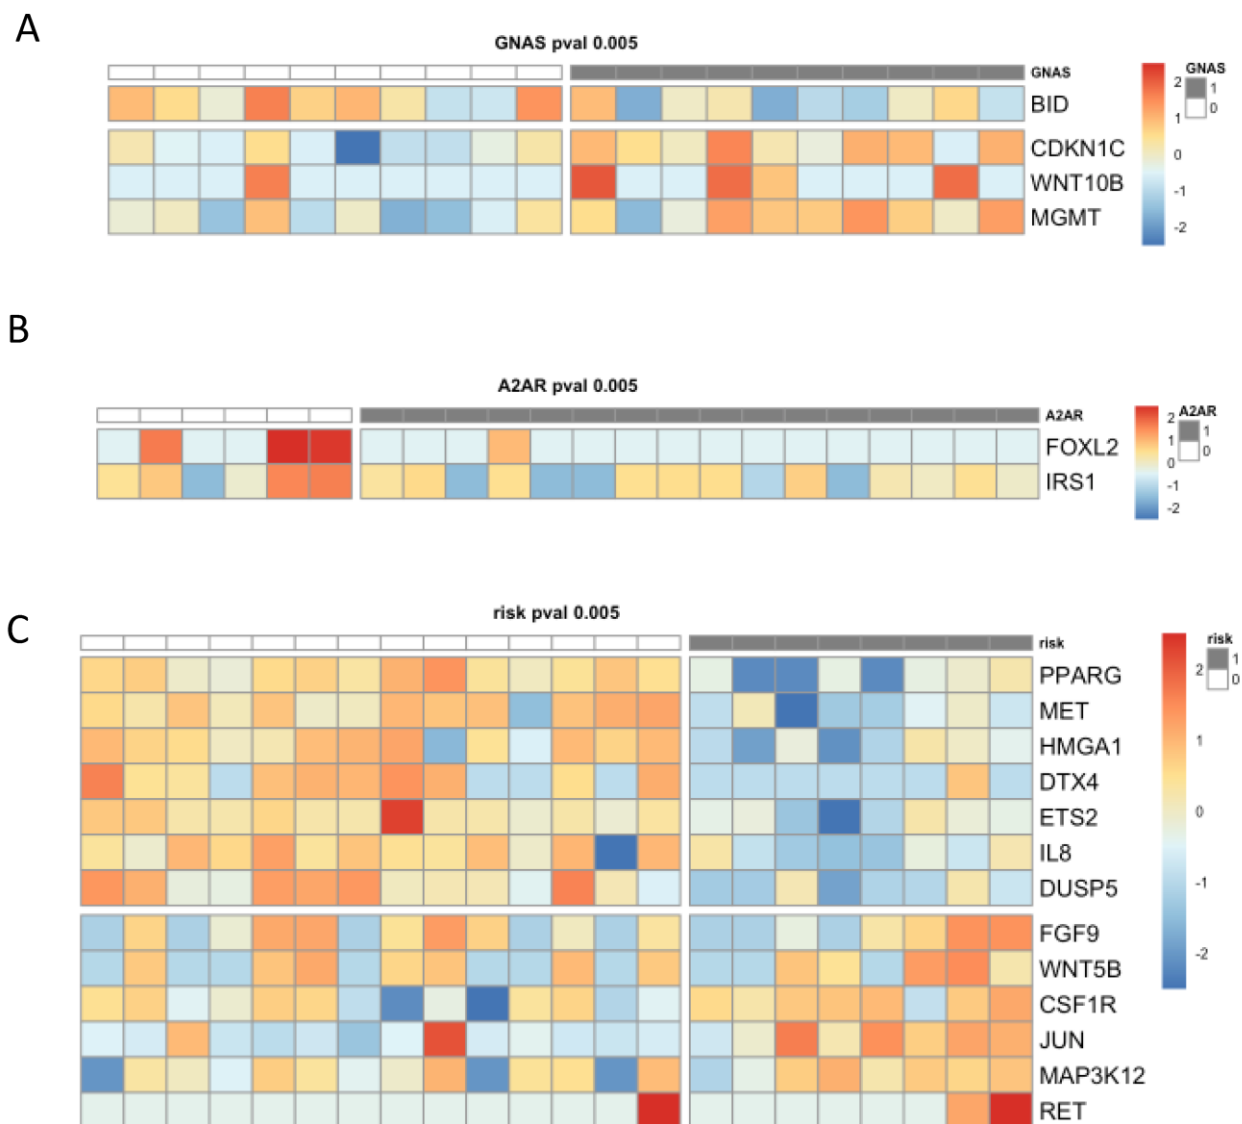

**Figure S1.** Expression analysis results. (A) Compared expression between GNAS mutated and wild type cases. Legend: 0: GNAS wild type; 1: GNAS mutation (B) Compared expression between A2AR positive and negative cases. Legend: 0: A2AR positive; 1: A2AR negative. (C) Compared expression between high- and low- risk cases. Legend: 0: low risk; 1: high risk.

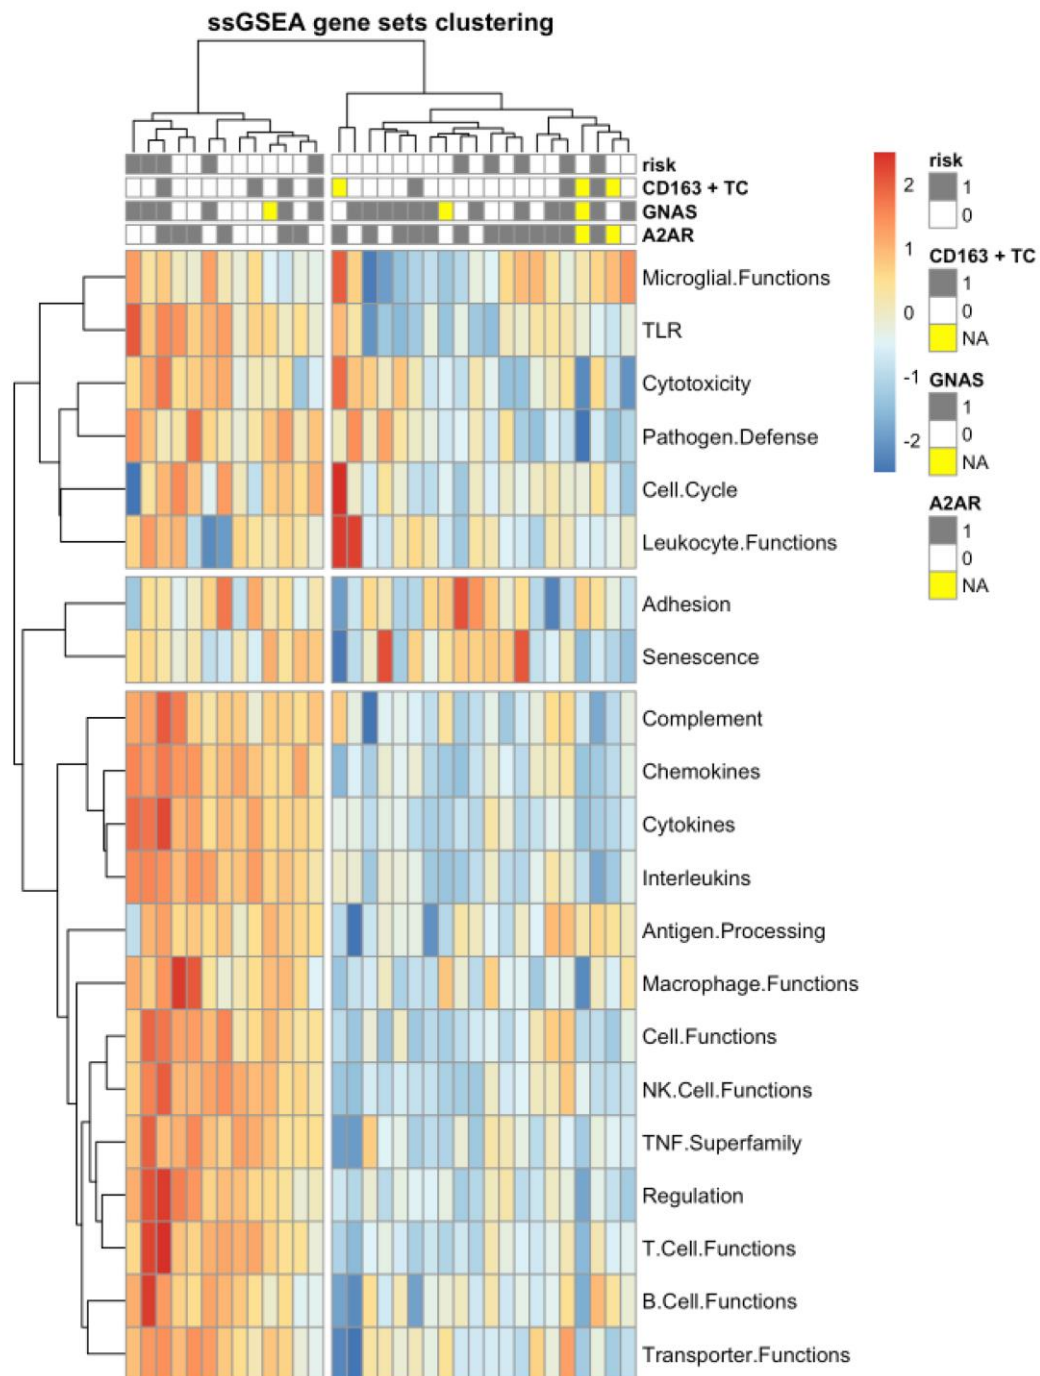

**Figure S2.** GSEA analysis. A group of 13 patients showed enrichment of genes whose expression is enhanced in immunological and inflammation pathways. Legend: 1: positive; 0: negative; NA: not available; TC: tumor cells.
